# Supplementary material for: Albumin-Mediated Size Exclusion Chromatography: The Apparent Molecular Weight of PSMA Radioligands as Novel Parameter to Estimate Their Blood Clearance Kinetics
Source: Pharmaceuticals (Basel). 2022 Sep 19;15(9):1161. doi: 10.3390/ph15091161 (PMC9500755; doi:10.3390/ph15091161)
Supplement: Supplementary file 1 [file pharmaceuticals-15-01161-s001.zip › pharmaceuticals-1887113-supplementary.pdf]

## Supplementary Material

# Albumin-Mediated Size Exclusion Chromatography: The Apparent Molecular Weight of PSMA Radioligands as Novel Parameter to Estimate Their Blood Clearance Kinetics

Jan-Philip Kunert <sup>1,\*</sup>, Sebastian Fischer <sup>1</sup>, Alexander Wurzer <sup>1</sup> and Hans-Jürgen Wester <sup>1</sup>

<sup>1</sup> Technical University of Munich (TUM), Germany; TUM Department of Chemistry, Chair of Pharmaceutical Radiochemistry

\* Correspondence: jan-philip.kunert@tum.de; Tel.: +49.89.289.12203

### Calculation of corrected retention times and exemplary calculation of normalized apparent molecular weight (MW<sub>app,norm.</sub>)

Throughout the development of the AMSEC method, three gel filtration columns of the same type (Superdex 75 Increase 10/300 GL gel filtration size exclusion column, fractionation range 70 – 3 kDa, GE Healthcare, Uppsala, Sweden) were used. The different columns gave slightly different retention times for the same probes, as exemplified by one of the calibration proteins, carbonic anhydrase (MW: 29 kDa), which showed retention times of 14.914 min, 14.352 min and 14.500 min, respectively. Calculations for the normalization of raw apparent molecular weights (MW<sub>app,raw</sub>) were performed with the input of absolute retention times. Data acquired on different columns were combined in normalization calculations. Therefore, experimentally determined retention times of chromatographic runs performed on column 2 (three AMSEC-runs of rhPSMA-7.3) and column 3 (one AMSEC-runs of rhPSMA-7.3 and blank-runs) had to be converted to equivalent retention times on column 1 by means of the calibration parameters of the three columns, as described in the following.

Due to the calibration of each column, the calculated MW of the same probe was assumed to be identical when determined on two columns (see Equation S1). Equating the calculation of the probe's MW on e.g. column 1 (C<sub>1</sub>; calibration parameters a<sub>C1</sub>, b<sub>C1</sub> and V<sub>0,C1</sub>) and column n (e.g. 2 and 3; C<sub>n</sub>; calibration parameters a<sub>Cn</sub>, b<sub>Cn</sub>, and V<sub>0,Cn</sub>), gives the following correlation (the formula for the calculation of MW is explained in the context of Table S3, see below):

$$MW = e^{\frac{0.8 \cdot t_{R,C1} - V_{0,C1}}{24 - V_{0,C1}} - b_{C1} / a_{C1}} = e^{\frac{0.8 \cdot t_{R,Cn} - V_{0,Cn}}{24 - V_{0,Cn}} - b_{Cn} / a_{Cn}} \quad (S1)$$

The transformation of Equation S1 gives the retention time of column 1 (t<sub>R,C1</sub>) as follows

$$t_{R,C1} = 1.25 \cdot \left\{ \left[ \left( \frac{a_{C1}}{a_{C2}} \cdot \left( \frac{0.8 \cdot t_{R,C2} - V_{0,C2}}{24 - V_{0,C2}} - b_{C2} \right) \right) + b_{C1} \right] \cdot (24 - V_{0,C1}) + V_{0,C1} \right\} \quad (S2)$$

Thus for a probe analyzed on column 2, an equivalent retention time on column 1 (t<sub>R,C1</sub>) can be calculated with Equation S2 using no other input than the experimentally determined retention time on column 2 (t<sub>R,C2</sub>) and the calibration parameters a, b and V<sub>0</sub> of both columns.

Experimentally detected retention times as well as retention times obtained from stepwise corrections for all the compounds are summarized in Table S1.

As an example, the calculation of the MW<sub>app,norm.</sub> of rhPSMA-7.1 was carried out as follows:

$$MW_{app} = e^{\frac{\frac{0.8 \cdot t_{R,norm.} - V_{0,C1}}{24 - V_{0,C1}} - b_{C1}}{a_{C1}}} = e^{\frac{\frac{0.8 \cdot 16.824 - 8.02880}{24 - 8.02880} - 2.09685}{-0.18028}} = 17067 [Da] \quad (S3)$$

**Table S1.** Experimental retention times of AMSEC-runs ( $t_{R,AMSEC}$  raw) and blank-runs ( $t_{R,blank}$  raw) as well as corrected retention times converted to column 1 ( $t_{R,AMSEC}$  C1 and  $t_{R,blank}$  C1) of HSA, acetone and all radioligands. Retention times of radiosignals are additionally corrected for the offset between UV-vis-detector and radio-detector ( $t_{R,AMSEC}$  C1 + OC and  $t_{R,blank}$  C1 + OC). C1: column 1; OC: offset-corrected; n.a.: not applicable.

| compound                | column<br>AMSEC | $t_{R,AMSEC}$ (min)<br>raw | $t_{R,AMSEC}$ (min)<br>C1 | $t_{R,AMSEC}$ (min)<br>C1 + OC <sup>1</sup> | column<br>blank | $t_{R,blank}$ (min)<br>raw | $t_{R,blank}$ (min)<br>C1 | $t_{R,blank}$ (min)<br>C1 + OC |
|-------------------------|-----------------|----------------------------|---------------------------|---------------------------------------------|-----------------|----------------------------|---------------------------|--------------------------------|
| HSA                     | -               | -                          | -                         | -                                           | 1               | 11.791                     | 11.791                    | n.a.                           |
| acetone                 | -               | -                          | -                         | -                                           | 3               | 24.596                     | 24.809                    | n.a.                           |
| rhPSMA-7.1              | 1               | 15.324                     | 15.324                    | 15.240                                      | 3               | 20.509                     | 20.795                    | 20.711                         |
| rhPSMA-7.2              | 1               | 14.648                     | 14.648                    | 14.564                                      | 3               | 20.238                     | 20.529                    | 20.445                         |
| rhPSMA-7.3 <sup>2</sup> | 1               | 14.806                     | 14.806                    | 14.722                                      | 3               | 20.391                     | 20.679                    | 20.595                         |
| rhPSMA-7.4              | 1               | 14.227                     | 14.227                    | 14.143                                      | 3               | 20.271                     | 20.561                    | 20.477                         |
| rhPSMA-10.1             | 1               | 15.494                     | 15.494                    | 15.410                                      | 3               | 21.025                     | 21.302                    | 21.218                         |
| rhPSMA-10.2             | 1               | 15.992                     | 15.992                    | 15.908                                      | 3               | 20.605                     | 20.889                    | 20.805                         |
| PSMA-617                | 1               | 17.670                     | 17.670                    | 17.586                                      | 3               | 22.100                     | 22.357                    | 22.273                         |
| PSMA-I&T                | 1               | 21.067                     | 21.067                    | 20.983                                      | 3               | 20.798                     | 21.079                    | 20.995                         |
| MC-1                    | 1               | 13.483                     | 13.483                    | 13.399                                      | 3               | 22.183                     | 22.439                    | 22.355                         |
| MC-2                    | 1               | 14.170                     | 14.170                    | 14.086                                      | 3               | 23.022                     | 23.263                    | 23.179                         |
| MC-3                    | 1               | 14.402                     | 14.402                    | 14.318                                      | 3               | 22.335                     | 22.588                    | 22.504                         |
| MC-4                    | 1               | 14.607                     | 14.607                    | 14.523                                      | 3               | 22.433                     | 22.684                    | 22.600                         |
| MC-5                    | 1               | 14.343                     | 14.343                    | 14.259                                      | 3               | 21.363                     | 21.634                    | 21.550                         |
| MC-6                    | 1               | 15.096                     | 15.096                    | 15.012                                      | 3               | 21.006                     | 21.283                    | 21.199                         |
| MC-7                    | 1               | 15.682                     | 15.682                    | 15.598                                      | 3               | 20.956                     | 21.234                    | 21.150                         |
| MC-8                    | 1               | 16.408                     | 16.408                    | 16.324                                      | 3               | 21.458                     | 21.727                    | 21.643                         |
| MC-9                    | 1               | 17.332                     | 17.332                    | 17.248                                      | 3               | 21.068                     | 21.344                    | 21.260                         |
| MC-10                   | 1               | 19.151                     | 19.151                    | 19.067                                      | 3               | 20.615                     | 20.899                    | 20.815                         |

<sup>1</sup>  $t_{R,AMSEC}$  as given in Table 1 and Table S2. <sup>2</sup> Data presented for rhPSMA-7.3 are taken from an exemplary experiment.

**Table S2.** Retention times of model compounds (MC) 1 to 10 in AMSEC-runs ( $t_{R,AMSEC}$ ) and corresponding raw apparent molecular weights ( $MW_{app,raw}$ ).

| radioligand | $t_{R,AMSEC}^1$ (min) | $MW_{app,raw}$ (kDa) |
|-------------|-----------------------|----------------------|
| MC-1        | 13.399                | 44.2                 |
| MC-2        | 14.086                | 36.5                 |
| MC-3        | 14.318                | 34.2                 |
| MC-4        | 14.523                | 32.4                 |
| MC-5        | 14.259                | 34.8                 |
| MC-6        | 15.012                | 28.2                 |
| MC-7        | 15.598                | 24.0                 |
| MC-8        | 16.324                | 19.6                 |
| MC-9        | 17.248                | 15.2                 |
| MC-10       | 19.067                | 9.2                  |

<sup>1</sup> retention times are already corrected for the offset between UV-vis- and radio-detector and normalized to column 1 as described above.

**Table S3.** Retention times of Blue Dextran 2000 (BD) and the calibration proteins conalbumin (CO, 75 kDa), ovalbumin (OV, 44 kDa), carbonic anhydrase (CA, 29 kDa), ribonuclease (RN, 13.7 kDa) and aprotinin (AP, 6.5 kDa) on superdex 75 increase columns 1, 2, and 3 (PBS pH 7.4 as mobile phase). *a* and *b*: calibration parameters; Cn: column n;  $V_e$ : elution volume;  $V_0$ : column void volume;  $R^2$ : coefficient of determination of column calibration.

| parameter        | column 1 | column 2 | column 3 |
|------------------|----------|----------|----------|
| $t_R$ (BD) (min) | 10.036   | 9.657    | 9.676    |
| $t_R$ (CO) (min) | 11.861   | 11.337   | 11.431   |
| $t_R$ (OV) (min) | 13.036   | 12.491   | 12.607   |
| $t_R$ (CA) (min) | 14.914   | 14.352   | 14.500   |
| $t_R$ (RN) (min) | 17.399   | 16.891   | 17.031   |
| $t_R$ (AP) (min) | 20.533   | 20.091   | 20.264   |
| $V_{0,Cn}$ (mL)  | 8.0288   | 7.7256   | 7.7408   |
| $V_e$ (CO) (mL)  | 9.4888   | 9.0696   | 9.1448   |
| $V_e$ (OV) (mL)  | 10.4288  | 9.9928   | 10.0856  |
| $V_e$ (CA) (mL)  | 11.9312  | 11.4816  | 11.6000  |
| $V_e$ (RN) (mL)  | 13.9192  | 13.5128  | 13.6248  |
| $V_e$ (AP) (mL)  | 16.4264  | 16.0728  | 16.2112  |
| $a_{Cn}$         | -0.18028 | -0.17873 | -0.18032 |
| $b_{Cn}$         | 2.09685  | 2.06926  | 2.09130  |
| $R^2_{Cn}$ (%)   | 99.2     | 99.1     | 99.1     |

Calibration parameters were determined as recommended by the manufacturer of Gel Filtration LMW Calibration Kits (GE Healthcare, Buckinghamshire, United Kingdom). In brief, the partition coefficient  $K_{av}$  was defined as:

$$K_{av} = \frac{V_e - V_0}{V_c - V_0} \quad (S4)$$

where  $V_e$  is the elution volume,  $V_0$  is the column void volume, and  $V_c$  is the geometric column volume of 24 mL.  $K_{av}$  is semi-logarithmically plotted against MW, and the resulting linear calibration curve gives the calibration parameters *a* and *b* according to the following equation:

$$K_{av} = a \cdot \ln(MW) + b . \quad (S5)$$

According to Equation S5, MW can be calculated from  $K_{av}$  and the calibration parameters  $a$  and  $b$  (Equation S6).  $K_{av}$  can be described according to Equation S4 wherein  $V_e$  is defined as the product of solvent flow (0.8 mL/min) with the retention time  $t_R$  resulting in Equation S6:

$$MW = e^{\frac{K_{av}-b}{a}} = e^{\frac{\frac{V_e-V_0}{V_c-V_0}-b}{a}} = e^{\frac{\frac{0.8 \cdot t_R-V_0}{24-V_0}-b}{a}} . \quad (S6)$$

**Chemical structures of  $^{177}\text{Lu}$ -labeled rhPSMA compounds and  $^{177}\text{Lu}$ -labeled references PSMA-617 and PSMA-I&T**

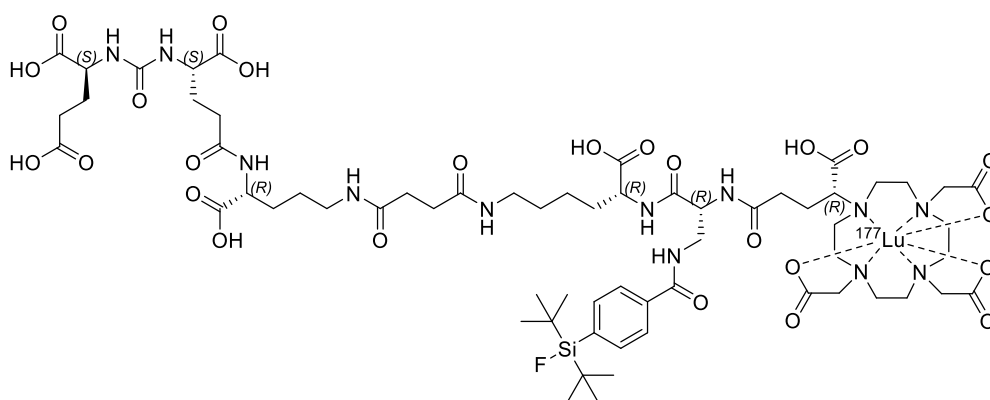

Chemical Formula:  $\text{C}_{63}\text{H}_{96}\text{F}^{177}\text{LuN}_{12}\text{O}_{25}\text{Si}$

Molecular Weight: 1645,55

**Figure S1:** Chemical structure of  $^{177}\text{Lu}$ -labeled rhPSMA-7.1 ((*R*)-configured diaminopropionic acid branching unit and (*R*)-configured DOTAGA chelator).

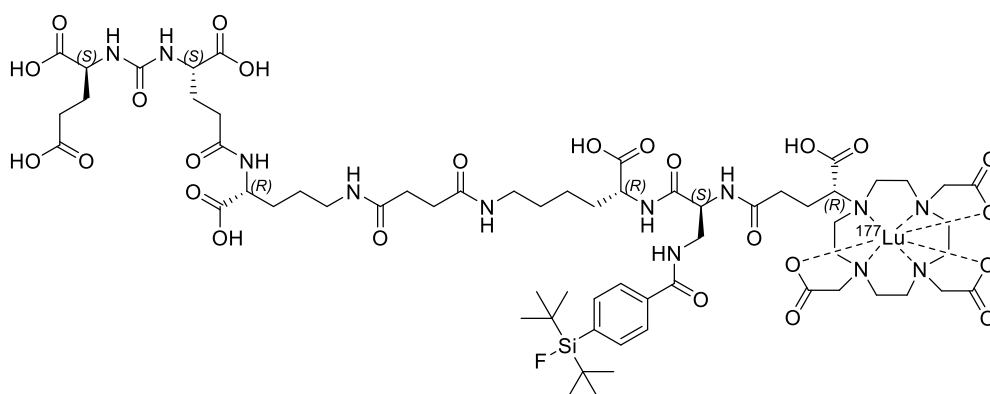

Chemical Formula:  $\text{C}_{63}\text{H}_{96}\text{F}^{177}\text{LuN}_{12}\text{O}_{25}\text{Si}$

Molecular Weight: 1645,55

**Figure S2:** Chemical structure of  $^{177}\text{Lu}$ -labeled rhPSMA-7.2 ((*S*)-configured diaminopropionic acid branching unit and (*R*)-configured DOTAGA chelator).

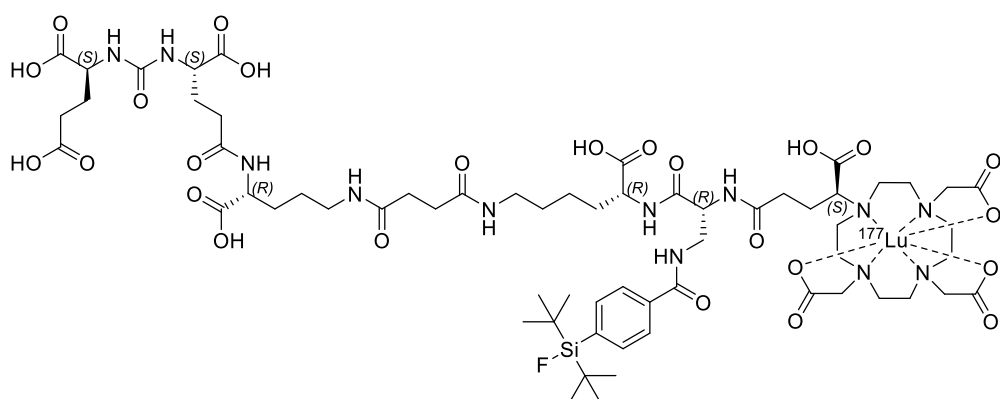

Chemical Formula:  $C_{63}H_{96}F^{177}LuN_{12}O_{25}Si$   
Molecular Weight: 1645,55

**Figure S3:** Chemical structure of  $^{177}Lu$ -labeled rhPSMA-7.3 ((*R*)-configured diaminopropionic acid branching unit and (*S*)-configured DOTAGA chelator).

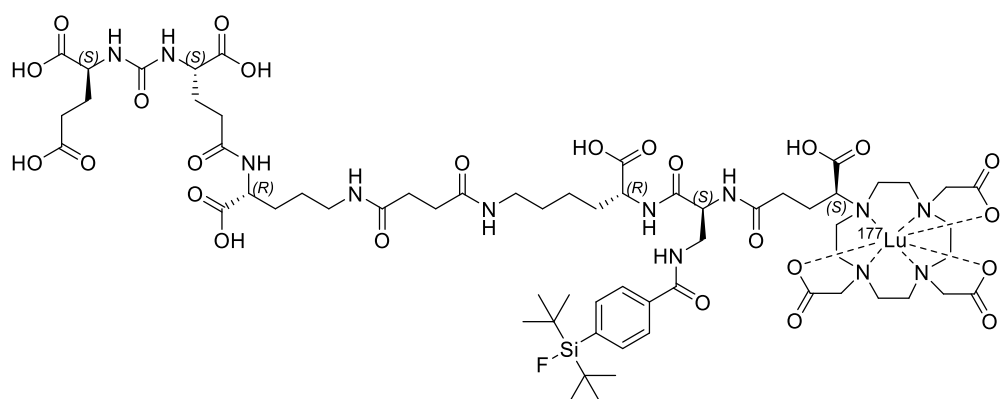

Chemical Formula:  $C_{63}H_{96}F^{177}LuN_{12}O_{25}Si$   
Molecular Weight: 1645,55

**Figure S4:** Chemical structure of  $^{177}Lu$ -labeled rhPSMA-7.4 ((*S*)-configured diaminopropionic acid branching unit and (*S*)-configured DOTAGA chelator).

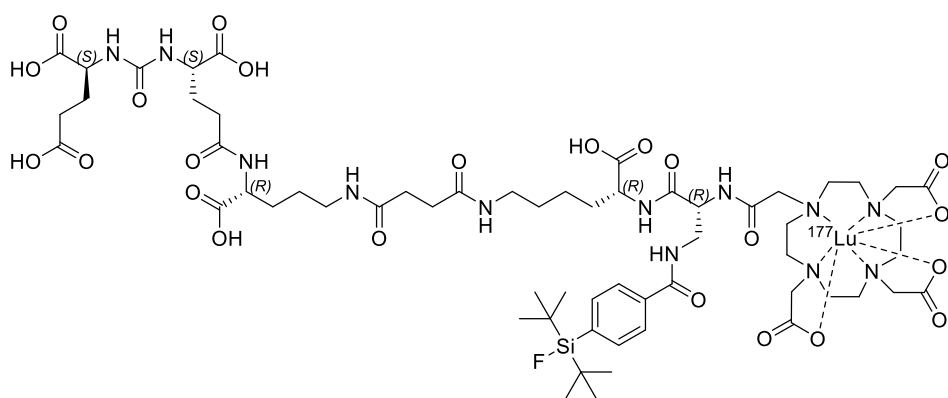

Chemical Formula:  $C_{60}H_{92}F^{177}LuN_{12}O_{23}Si$   
Molecular Weight: 1573,48

**Figure S5:** Chemical structure of  $^{177}\text{Lu}$ -labeled rhPSMA-10.1 ((*R*)-configured diaminopropionic acid branching unit and DOTA chelator).

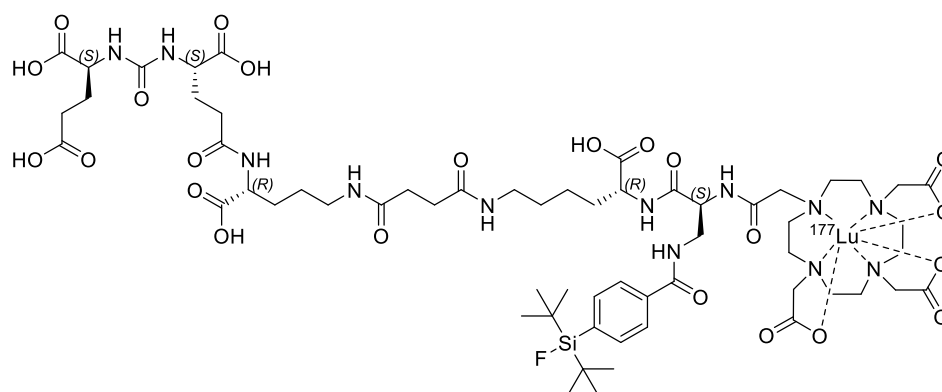

Chemical Formula:  $\text{C}_{60}\text{H}_{92}\text{F}^{177}\text{LuN}_{12}\text{O}_{23}\text{Si}$   
Molecular Weight: 1573,48

**Figure S6:** Chemical structure of  $^{177}\text{Lu}$ -labeled rhPSMA-10.2 ((*S*)-configured diaminopropionic acid branching unit and DOTA chelator).

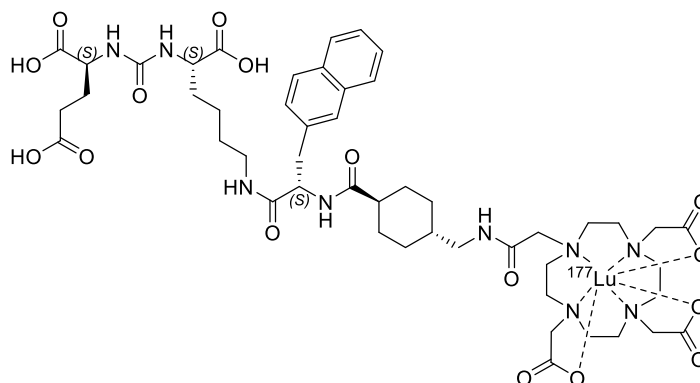

Chemical Formula:  $\text{C}_{49}\text{H}_{68}^{177}\text{LuN}_9\text{O}_{16}$   
Molecular Weight: 1216,07

**Figure S7:** Chemical structure of  $^{177}\text{Lu}$ -labeled PSMA-617.

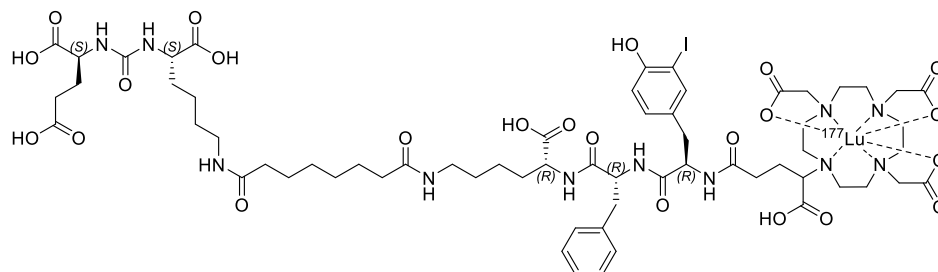

Chemical Formula:  $\text{C}_{63}\text{H}_{89}\text{I}^{177}\text{LuN}_{11}\text{O}_{23}$   
Molecular Weight: 1672,31

**Figure S8:** Chemical structure of  $^{177}\text{Lu}$ -labeled PSMA-I&T.

Chemical structures of MC1-10 have not yet been disclosed.
